# Supplementary material
Source: PubMed Central journal article supplement (PMC3617377)
Supplement: mmc1.pdf [file mmc1.pdf]

The American Journal of Human Genetics, Volume 92

## **Supplemental Data**

### **Mutations in *LARS2*, Encoding Mitochondrial**

### **Leucyl-tRNA Synthetase, Lead to Premature**

### **Ovarian Failure and Hearing Loss in Perrault Syndrome**

Sarah B. Pierce, Ksenija Gersak, Rachel Michaelson-Cohen, Tom Walsh, Ming K. Lee, Daniel Malach, Rachel E. Klevit, Mary-Claire King, and Ephrat Levy-Lahad

### **Figure S1. Alignments to Human and *E. coli* Leucine-Specific Domains**

The HHblits algorithm was used to generate alignments to the human LARS2 (A) and *E. coli* LeuRS (B) leucine-specific domains. The query sequences (top line of each alignment) were anchored by conserved sequences QG at the N-terminal end and by the KMSKS motif at the C-terminal end. Columns for which no residue was present in the query sequence were removed and the alignments were displayed with Jalview.<sup>1</sup> The consensus sequences for the region including HARS2 p.Thr522 and LeuRS p.Ala508 (indicated by asterisk) are identical (underlined).

### **Reference**

1. Waterhouse, A.M., Procter, J.B., Martin, D.M., Clamp, M., and Barton, G.J. (2009) Jalview Version 2 - a multiple sequence alignment editor and analysis workbench. *Bioinformatics*. 25, 1189-1191.
